# Supplementary material for: Tad and toxin-coregulated pilus structures reveal unexpected diversity in bacterial type IV pili
Source: PubMed Central journal article supplement — Proc Natl Acad Sci U S A. 2023 Nov 27;120(49):e2316668120. doi: 10.1073/pnas.2316668120 (PMC10710030; doi:10.1073/pnas.2316668120), 2023-11-27
Supplement: pnas.2316668120.sapp.pdf [file pnas.2316668120.sapp.pdf]

## Supporting Information for

Tad and toxin coregulated pilus structures reveal unexpected diversity in bacterial type IV pili

Ravi R. Sonani<sup>1</sup>, Juan Carlos Sanchez<sup>2</sup>, Joseph K. Baumgardt<sup>2</sup>, Shivani Kundra<sup>3</sup>, Elizabeth R. Wright<sup>2</sup>, Lisa Craig<sup>3</sup> and Edward H. Egelman<sup>1</sup>

<sup>1</sup>Department of Biochemistry and Molecular Genetics, University of Virginia, Charlottesville, VA 22903, U.S.A.

<sup>2</sup>Department of Biochemistry, University of Wisconsin-Madison, Madison, WI 53706, USA

<sup>3</sup>Department of Molecular Biology and Biochemistry, Simon Fraser University  
Burnaby, British Columbia, BC V5A 1S6, Canada

\*Corresponding Author: Edward H. Egelman

Email: ehe2n@virginia.edu

### **This PDF file includes:**

Figures S1 to S10  
Tables S1 to S2  
Legend for Movie S1

### **Other supporting materials for this manuscript include the following:**

Movie S1

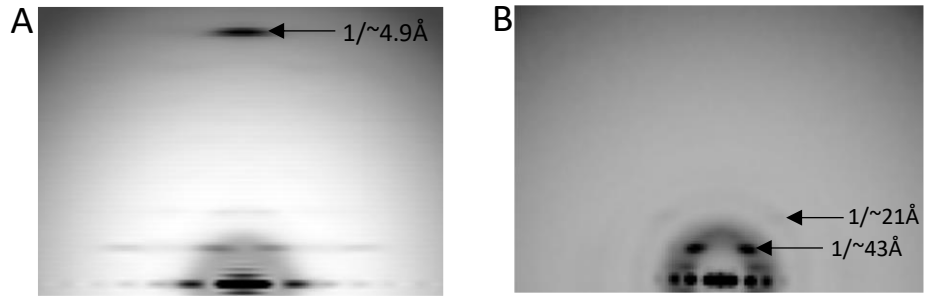

**Supplementary Figure 1:** Averaged power spectrum from raw segments of **(A)** *C. crescentus* tad pilus and **(B)** *V. cholerae* TCP.

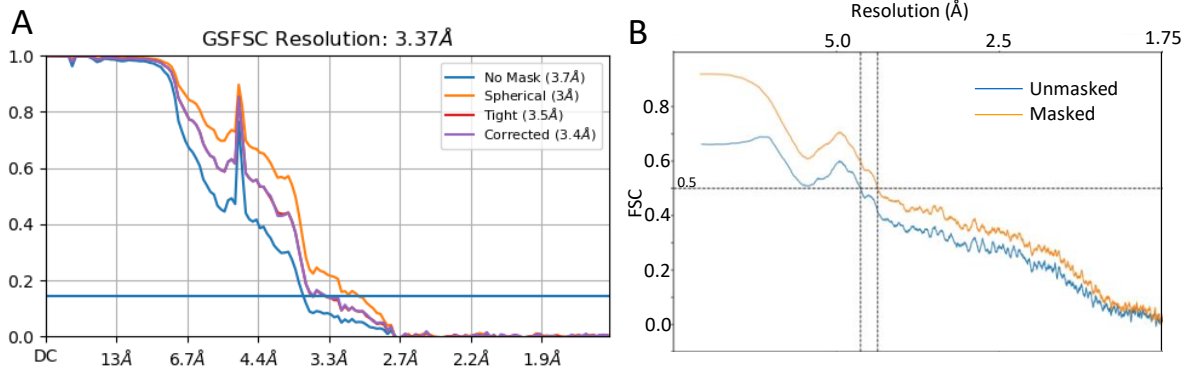

**Supplementary Figure 2: (A)** Map:map Gold Standard Fourier Shell Correlation (GSFSC) curves (threshold 0.143) of *C. crescentus* tad pilus **(B)** Map:model Fourier Shell Correlation (FSC) curves (threshold 0.4=v.143) for *V. cholerae* TCP.

```

1 Flp motif 10      20*      30      40
Aa VTAIEYGLIAIAVAVLIVAVFYSNNGFIANIQSKFNSLASTVNSANVTK--
Cc ATAIEYGLIVALIAVVIVTAVTTLG---TNIRTAFTKAGAAVSTAAGT---
Pb ATAIEYGLIVALIAVVIITAVTTVG---SNIKTSFTSVGTSIR-----
Os ATAIEYGLIAALIAVVIITAVTTLG---TNISSTFTNVGTQISTANGGGEG
Ps ATAIEYGLIAALIAVVLVSALQIVG---TSLQGAFTTISDAVSDAAG----
Ab ATAIEYGLIVTLIAVVIITAVTTLG---TNIKAKFTATSTAIGS-----
Bs ATAIEYGLIAALIAVVIITAVTLLG---TNIKATFNNIAAEIGKAKS----
Bc ATAIEYGLIAALIAVVIIGATTTTLG---TNISAKFTEVAEAISGAGGGE--
Rc ATAIEYGLIAALIAVVIISAVTALG---TTIKTKFNAVVTGMGGTAGA---
Rb ATAIEYGLIAALIAVVIAAVTALG---TNISTAFTDVSDAIAGA-----

```

**Supplementary Figure 3:** Multiple sequence alignment of bacterial tad/flp pilins. The residues containing the polar side chain are shown in blue. Red boxes indicate the conservation of the solvent accessible polar residues present at C-terminal end of helix. Position 22 is indicated by \* to show the absence of prolines in the tad/flp pilins. The conserved 'flp motif' is indicated by a red line. Abbreviations, *Aa*: *Aggregatibacter actinomycetemcomitans*; *Cc*: *Caulobacter crescentus*; *Pb*: *Pseudomonadota bacterium*; *Os*: *Oceanicaulis* sp.; *Ps*: *Phenylobacterium* sp.; *Ab*: *Alphaproteobacteria bacterium*; *Bs*: *Brevundimonas* sp.; *Bc*: *Brucella cytisi*; *Rc*: *Rhizobium* sp. CRIBSB; *Rb*: *Roseibacterium beibuensis*.

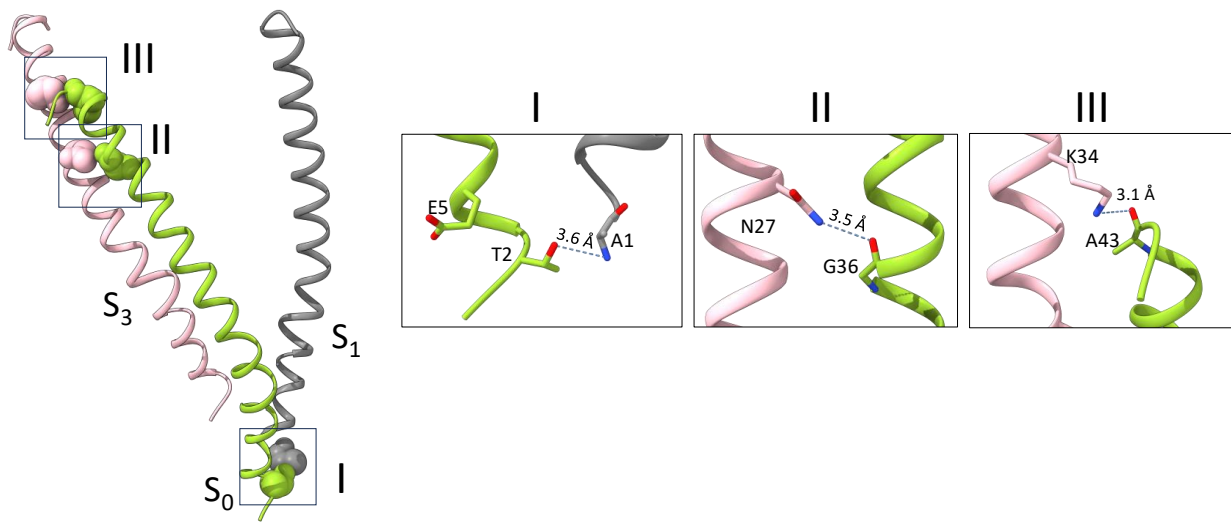

**Supplementary Figure 4:** Specific polar interactions between *C. crescentus* tad pilins. Interaction I: S<sub>0</sub> Thr2 - S<sub>1</sub> Ala1; Interaction II: S<sub>0</sub> Gly36 - S<sub>3</sub> Asn27; Interaction III: S<sub>0</sub> Ala43 - S<sub>3</sub> Lys34.

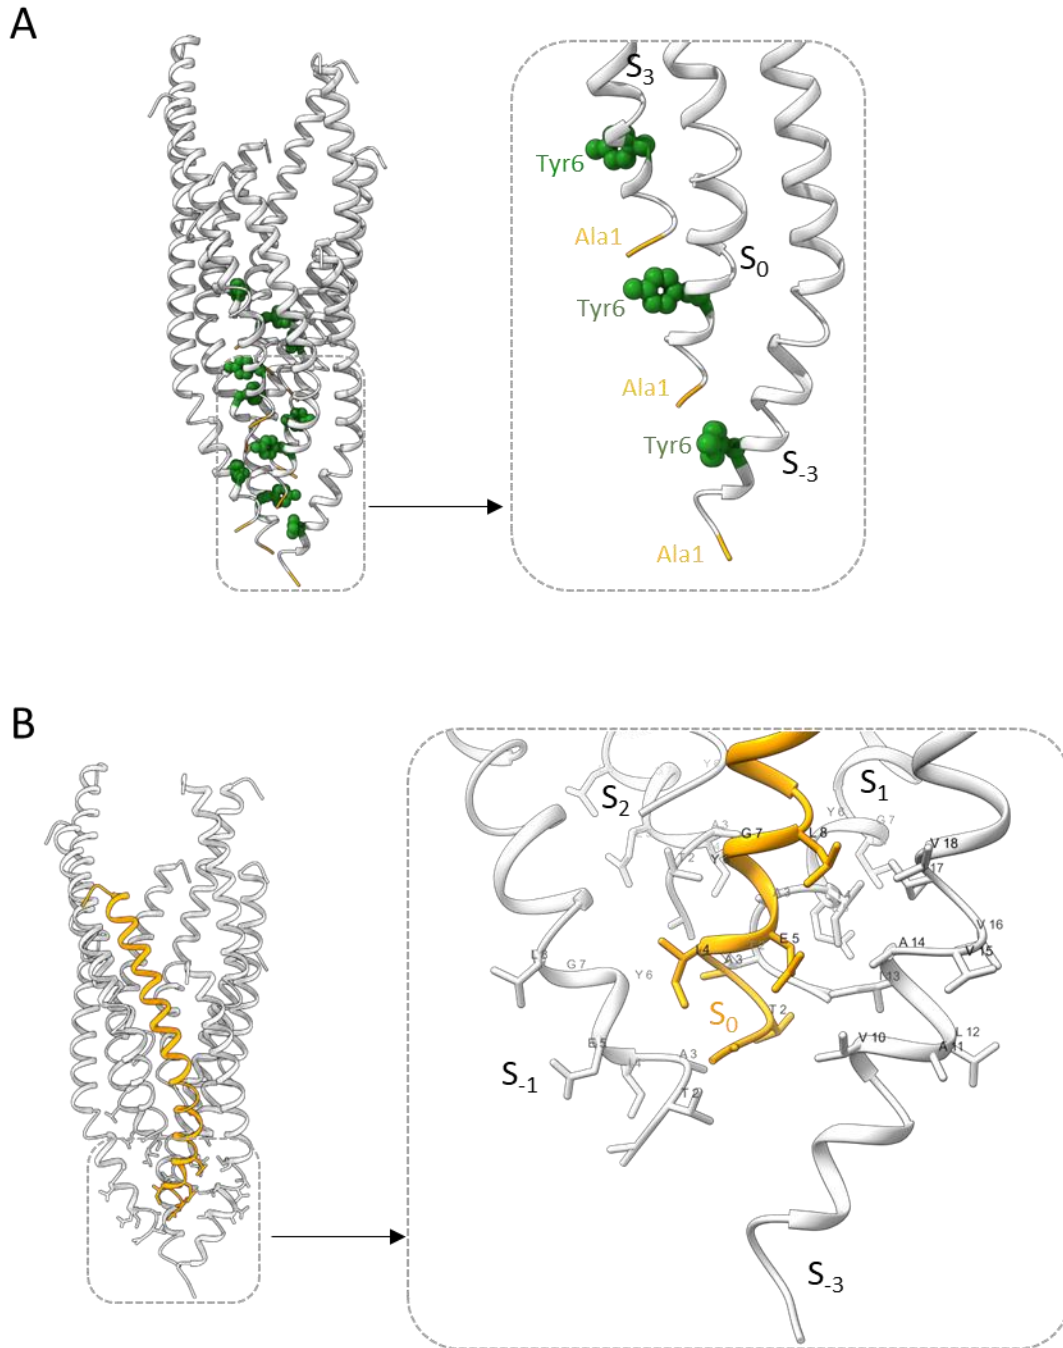

**Supplementary Figure 5: Nonpolar interactions between tad pilins. (A)** Tyr6 of  $S_0$  subunit interacts with the Ala1 of the  $S_3$  along with the interactions shown in Supplementary Figure 4 keeping tad pilins in helical register. **(B)** The Flp motif hydrophobic residues (Val1, Ala3, Ile4, Gly7, Leu8 and Ile9) of  $S_0$  form extensive hydrophobic contacts with that of  $S_{-1}$ ,  $S_1$  and  $S_2$ , and to the residues 10-18 of  $S_3$  stabilizing the core of tad filament.

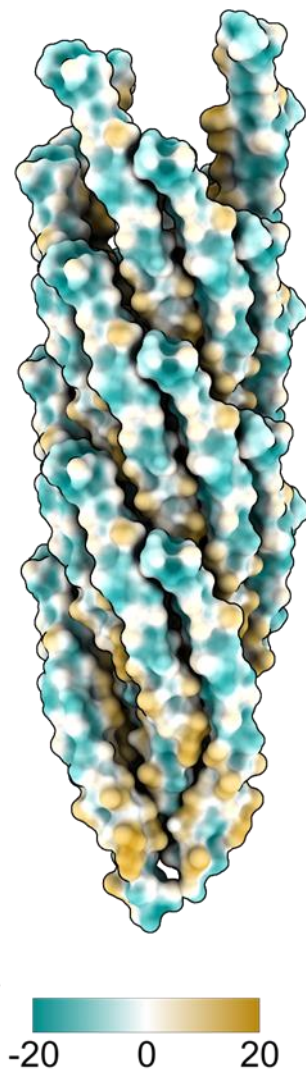

**Supplementary Figure 6:** Surface lipophilicity of *C. crescentus* tad pilus. Polar and hydrophobic surfaces are represented by green and gold color respectively.

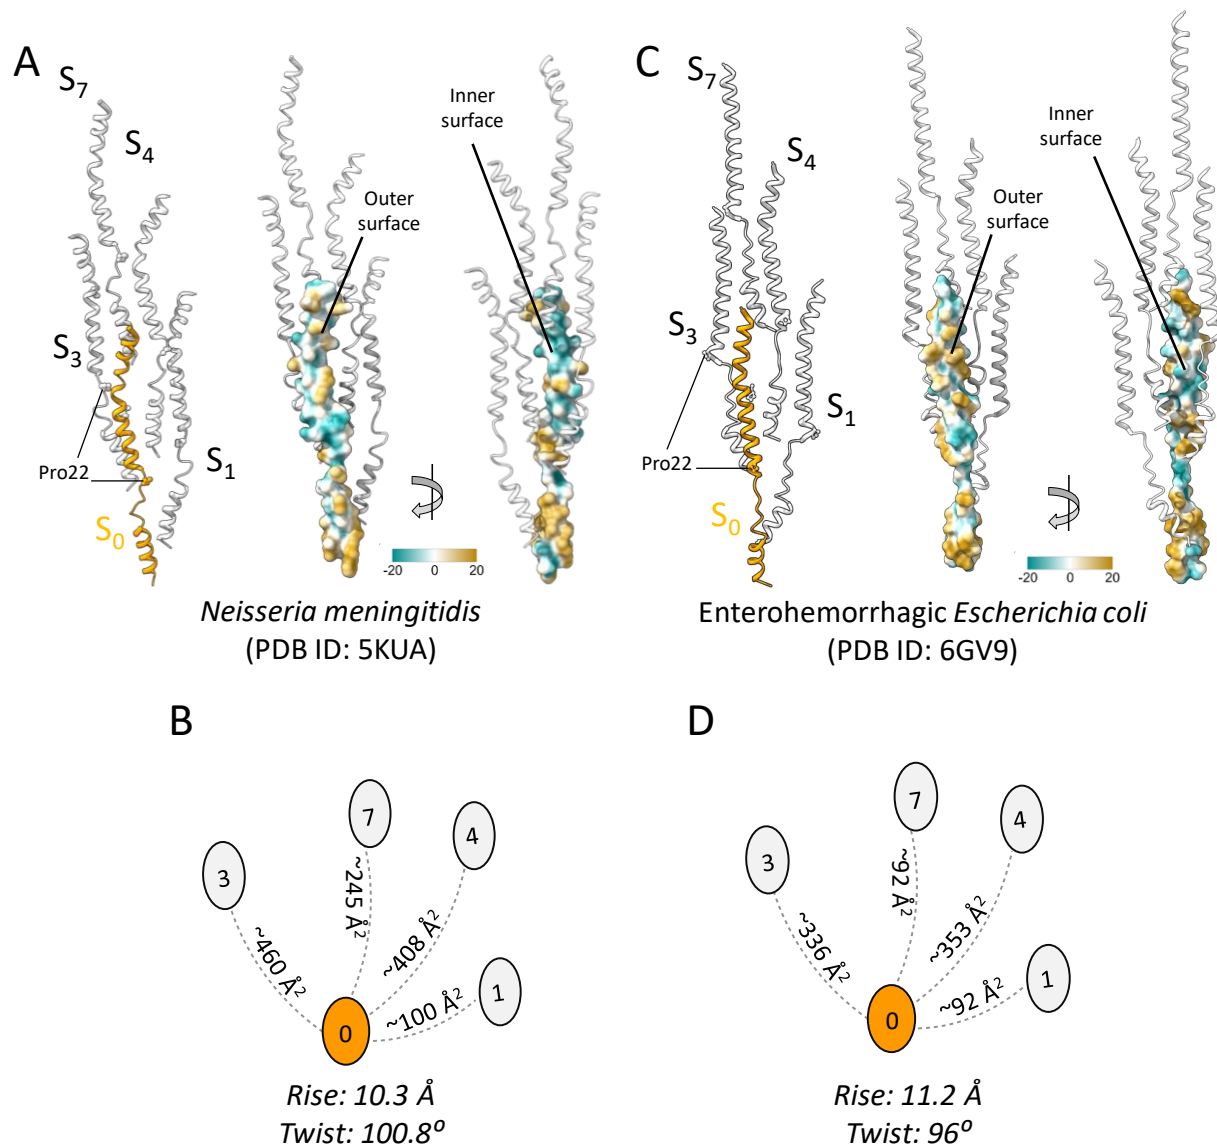

**Supplementary Figure 7:** Helical packing and surface lipophilicity of bacterial T4a pili. (A, B) *Neisseria meningitidis*, (C,D) EHEC. A and C show the helical packing with surface lipophilicity of the  $S_0$  pilin (middle and right panels). The helix breaker Pro22 is shown as an atomic sphere. Polar-to-hydrophobic surfaces are represented by color gradient green-to-gold as shown in lipophilicity scale. B and D show the interfacial area between the helical symmetry mates calculated by PISA, and the helical symmetry parameters.



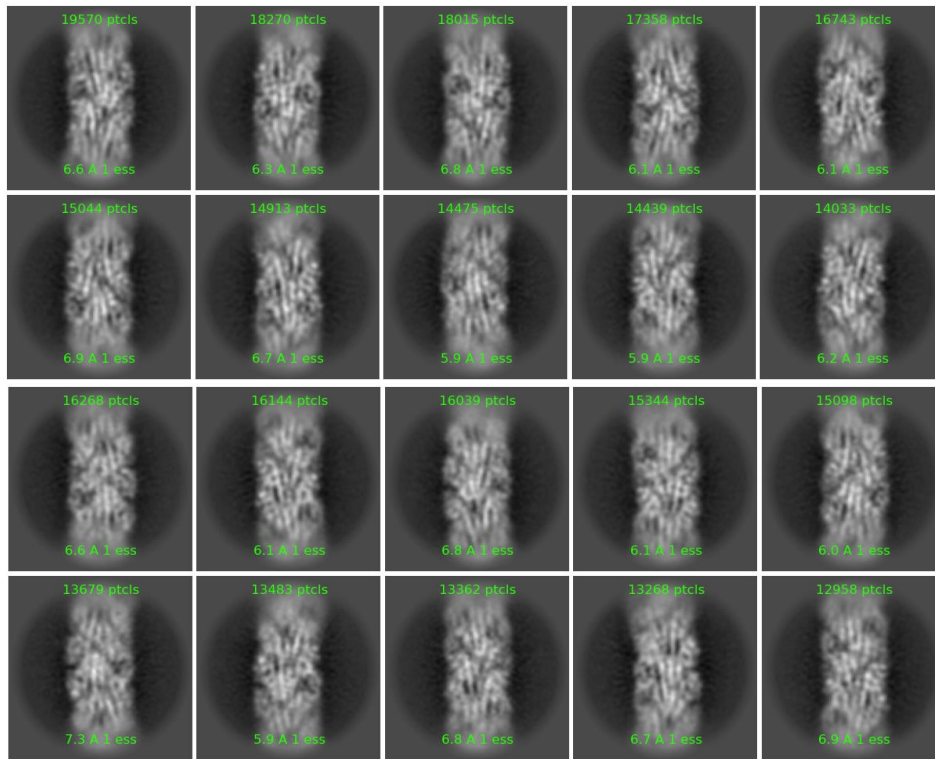

**Supplementary Figure 8:** Two-dimensional class averages of *V. cholerae* TCP filament showing its flexible morphology.

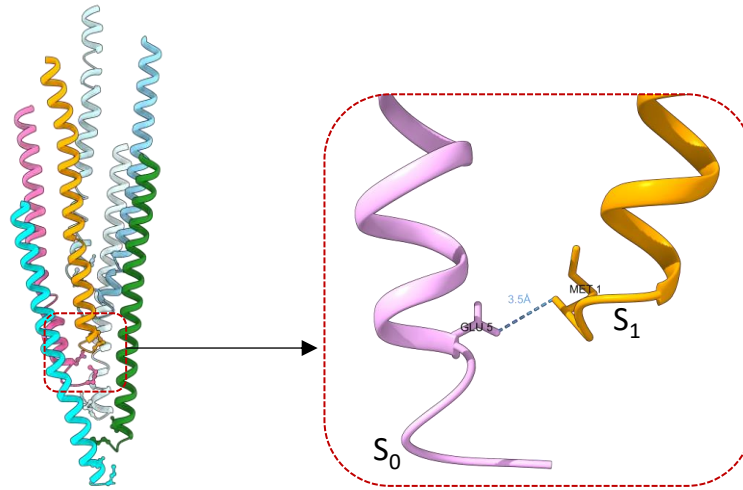

**Supplementary Figure 9:** Salt-bridge between the Glu5 of S<sub>0</sub> subunit and N-terminus of the S<sub>1</sub> subunit governs the helical registering of TCP pilins in the filament.

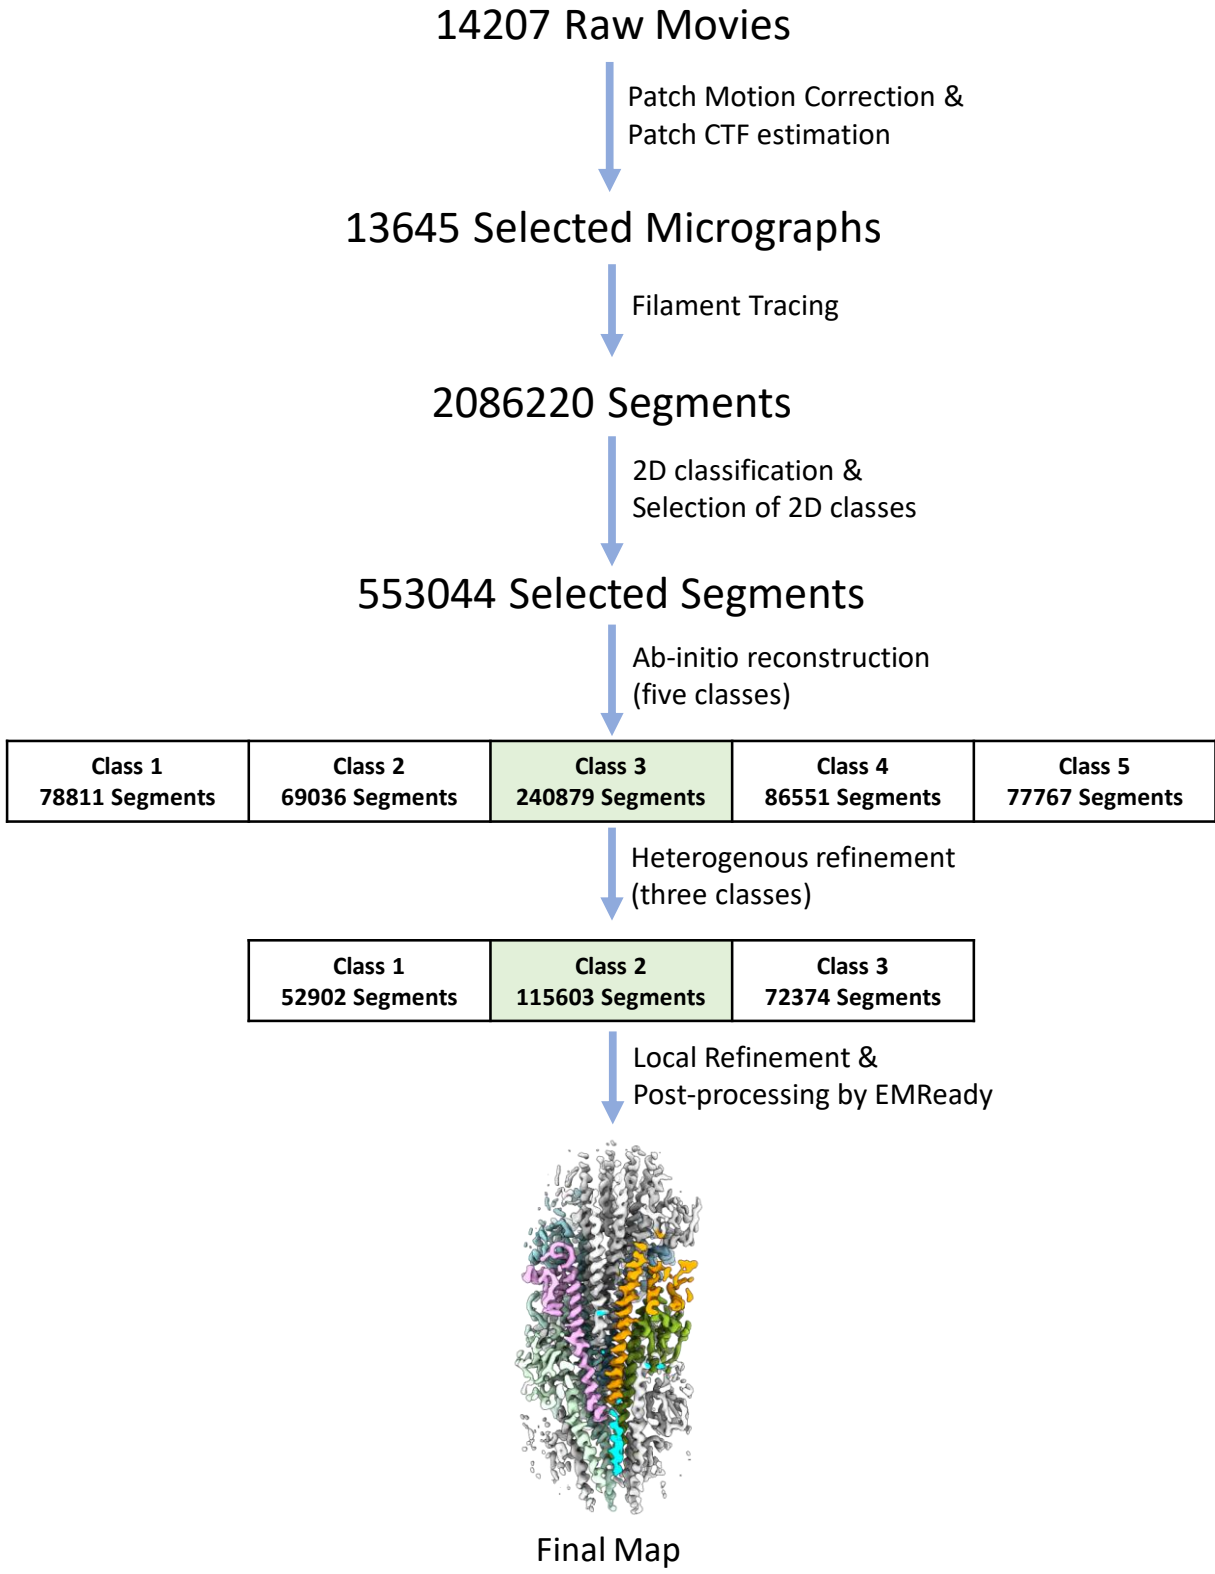

**Supplementary Figure 10:** Data processing workflow for the cryo-EM reconstruction of *V. cholerae* TCP filament.

**Supplementary Table 1. Common features of members of the Type IV filament family**

| Features                    |                                           | T4aP                                                                                                                              | T4bP                                                                                                                                                                                                                                                                                           | T4cP (tad/flip)                                                                                                                                                                                       | Archaeal T4P                                                                                                                                                | T2S endopili                                                                                                                          |
|-----------------------------|-------------------------------------------|-----------------------------------------------------------------------------------------------------------------------------------|------------------------------------------------------------------------------------------------------------------------------------------------------------------------------------------------------------------------------------------------------------------------------------------------|-------------------------------------------------------------------------------------------------------------------------------------------------------------------------------------------------------|-------------------------------------------------------------------------------------------------------------------------------------------------------------|---------------------------------------------------------------------------------------------------------------------------------------|
| <b>Major pilin features</b> | Signal peptide length (residues)          | ~ 6 aa                                                                                                                            | ~25                                                                                                                                                                                                                                                                                            | 7-40                                                                                                                                                                                                  | ~4-18                                                                                                                                                       | 6-8                                                                                                                                   |
|                             | Overall length of mature pilin (residues) | 140 – 170                                                                                                                         | ~200                                                                                                                                                                                                                                                                                           | 40 – 60                                                                                                                                                                                               | 125-300                                                                                                                                                     | ~135                                                                                                                                  |
|                             | Residue 1                                 | Phe                                                                                                                               | variable                                                                                                                                                                                                                                                                                       | variable                                                                                                                                                                                              | variable                                                                                                                                                    | Phe                                                                                                                                   |
|                             | Residue 2                                 | Ser/Thr                                                                                                                           | Ser/Thr                                                                                                                                                                                                                                                                                        | Thr                                                                                                                                                                                                   | Ser/Thr/Pro                                                                                                                                                 | Ser/Thr                                                                                                                               |
|                             | Residue 5                                 | Glu                                                                                                                               | Glu                                                                                                                                                                                                                                                                                            | Glu                                                                                                                                                                                                   | variable                                                                                                                                                    | Glu                                                                                                                                   |
|                             | Residue 22                                | Pro                                                                                                                               | variable                                                                                                                                                                                                                                                                                       | variable                                                                                                                                                                                              | variable                                                                                                                                                    | Pro                                                                                                                                   |
| <b>Pilus machinery</b>      | Operons                                   | multiple                                                                                                                          | single                                                                                                                                                                                                                                                                                         | single                                                                                                                                                                                                | multiple                                                                                                                                                    | single                                                                                                                                |
|                             | Retraction ATPase                         | yes                                                                                                                               | no                                                                                                                                                                                                                                                                                             | no                                                                                                                                                                                                    | no                                                                                                                                                          | no                                                                                                                                    |
|                             | No. of minor pilins                       | 4                                                                                                                                 | 1                                                                                                                                                                                                                                                                                              | 1-3                                                                                                                                                                                                   | variable                                                                                                                                                    | 4                                                                                                                                     |
|                             | Examples                                  | <i>Neisseria gonorrhoeae</i> , <i>Pseudomonas aeruginosa</i> , <i>Myxococcus xanthus</i> T4P, <i>V. cholerae</i> competence pilus | <i>Vibrio cholerae</i> Toxin Coregulated Pilus (TCP), enterotoxigenic <i>E. coli</i> (ETEC, CFA/III, Longus pili), <i>Citrobacter rodentium</i> , <i>Salmonella enterica</i> serovar Typhi, <i>Yersinia pseudotuberculosis</i> T4P, enteropathogenic <i>E. coli</i> bundle forming pilus (BFP) | <i>Caulobacter crescentus</i> Cpa pilus, <i>Aggregatibacter actinomycetemcomitans</i> Flp pili, <i>Salmonella enterica</i> R64 thin pilus, <i>Haemophilus ducreyi</i> , <i>Ralstonia solanacearum</i> | <i>Ignicoccus hospitalis</i> , <i>Sulfolobus solfataricus</i> , <i>Sulfolobus islandicus</i> , <i>Haloferax volcanii</i> , <i>Methanococcus maripaludis</i> | <i>V. cholerae</i> , ETEC, <i>P. aeruginosa</i> , <i>Klebsiella oxytoca</i> , <i>Legionella pneumophila</i> , <i>Dickeya dadantii</i> |

**Supplementary Table 2:** Cryo-EM data collection and refinement statistics of *C. crescentus* tad pilus and *V. cholerae* TCP reconstructions and models

|                                                      | <i>C. crescentus</i> tad pilus                                                                                                          | <i>V. cholerae</i> TCP (Asymmetric)                                                                                                                                             | <i>V. cholerae</i> TCP (Helical) |
|------------------------------------------------------|-----------------------------------------------------------------------------------------------------------------------------------------|---------------------------------------------------------------------------------------------------------------------------------------------------------------------------------|----------------------------------|
| PDB entry                                            | 8U1K                                                                                                                                    | 8UHF                                                                                                                                                                            | -                                |
| EMBD entry                                           | 41815                                                                                                                                   | 42279                                                                                                                                                                           | 41968                            |
| Voltage (kV)                                         | 300                                                                                                                                     | 300                                                                                                                                                                             | 300                              |
| Electron exposure (e <sup>-</sup> / Å <sup>2</sup> ) | 50                                                                                                                                      | 50                                                                                                                                                                              | 50                               |
| Pixel size (Å/pixel)                                 | 0.834                                                                                                                                   | 0.83                                                                                                                                                                            | 0.83                             |
| Particle images (no.)                                | 179116                                                                                                                                  | 115603                                                                                                                                                                          | 33045                            |
| Helical parameters (axial rise / twist)              | 4.9 Å / 102.8°                                                                                                                          | -                                                                                                                                                                               | ~8.3 Å / ~97.0°                  |
| <b>Map global resolution (Å)</b>                     |                                                                                                                                         |                                                                                                                                                                                 |                                  |
| Map:map FSC (0.143)                                  | 3.4 Å                                                                                                                                   | 3.8 Å                                                                                                                                                                           | 5.8 Å                            |
| Model:map FSC (0.5)                                  | 3.3 Å                                                                                                                                   | 4.0 Å                                                                                                                                                                           | -                                |
| <b>Refinement and model validation</b>               |                                                                                                                                         |                                                                                                                                                                                 |                                  |
| Clash score                                          | 14.42                                                                                                                                   | 9.99                                                                                                                                                                            |                                  |
| <i>RMSD</i>                                          |                                                                                                                                         |                                                                                                                                                                                 |                                  |
| Bond Length (Å)                                      | 0.004                                                                                                                                   | 0.002                                                                                                                                                                           |                                  |
| Bond Angle (°)                                       | 0.603                                                                                                                                   | 0.515                                                                                                                                                                           |                                  |
| <i>Ramachandran plot statistics (%)</i>              |                                                                                                                                         |                                                                                                                                                                                 |                                  |
| Favoured                                             | 97.67                                                                                                                                   | 96.96                                                                                                                                                                           |                                  |
| Allowed                                              | 2.33                                                                                                                                    | 3.04                                                                                                                                                                            |                                  |
| Outliers                                             | 0.00                                                                                                                                    | 0.00                                                                                                                                                                            |                                  |
| Model composition                                    | <b>Chain ID: Residues</b><br>A: 1-45<br>B: 1-45<br>C: 1-45<br>D: 1-45<br>E: 1-45<br>F: 1-45<br>G: 1-45<br>H: 1-45<br>I: 1-45<br>J: 1-45 | <b>Chain ID: Residues</b><br>A: 1-53, 61-199<br>B: 1-198<br>C: 1-198<br>D: 1-55, 60-196<br>E: 1-52, 61-198<br>F: 1-54, 61-198<br>G: 1-198<br>H: 2-52, 62-198<br>I: 2-55, 62-198 |                                  |

**Legend for Supplementary Movie 1:** Animation of the averaged power spectra of segments from two different classes. The change in the spacing of the strongest layer line ( $n=3$ ) corresponds to a change in the pitch of the 3-start helices from  $\sim 116$  Å to  $\sim 127$  Å. A reference-based classification of the TCP segments using models with different axial rise values was employed to obtain these classes.
